# Supplementary material for: Half-sandwich ruthenium complexes with acylhydrazone ligands: synthesis and catalytic activity in the N-alkylation of hydrazides
Source: Royal Society of Chemistry journal article supplement (doi:10.1039/d3dt04078j), 2023-12-29
Supplement: d3dt04078j1.pdf [file d3dt04078j1.pdf]

## Supporting Information

### **Half-sandwich ruthenium complexes with acylhydrazone ligands: synthesis and catalytic activity in N-alkylation of hydrazides**

Heng Li,<sup>a</sup> Ke Wang,<sup>a</sup> Lin Yang,<sup>a</sup> Yu-Zhou Luo,<sup>c</sup> Zi-Jian Yao<sup>\*a,b</sup>

<sup>a</sup> School of Chemical and Environmental Engineering, Shanghai Institute of Technology, Shanghai, 201418, China.

<sup>b</sup> State Key Laboratory of Structural Chemistry, Fujian Institute of Research on the Structure of Matter, Chinese Academy of Sciences, Fuzhou, Fujian 350002, China

<sup>c</sup> Scientific Research Office, Guangzhou College of Commerce, Guangzhou, 511363, China.

Corresponding author: Email: [zjyao@sit.edu.cn](mailto:zjyao@sit.edu.cn); Tel: +86-21-60877231, Fax: +86-21-60877227.

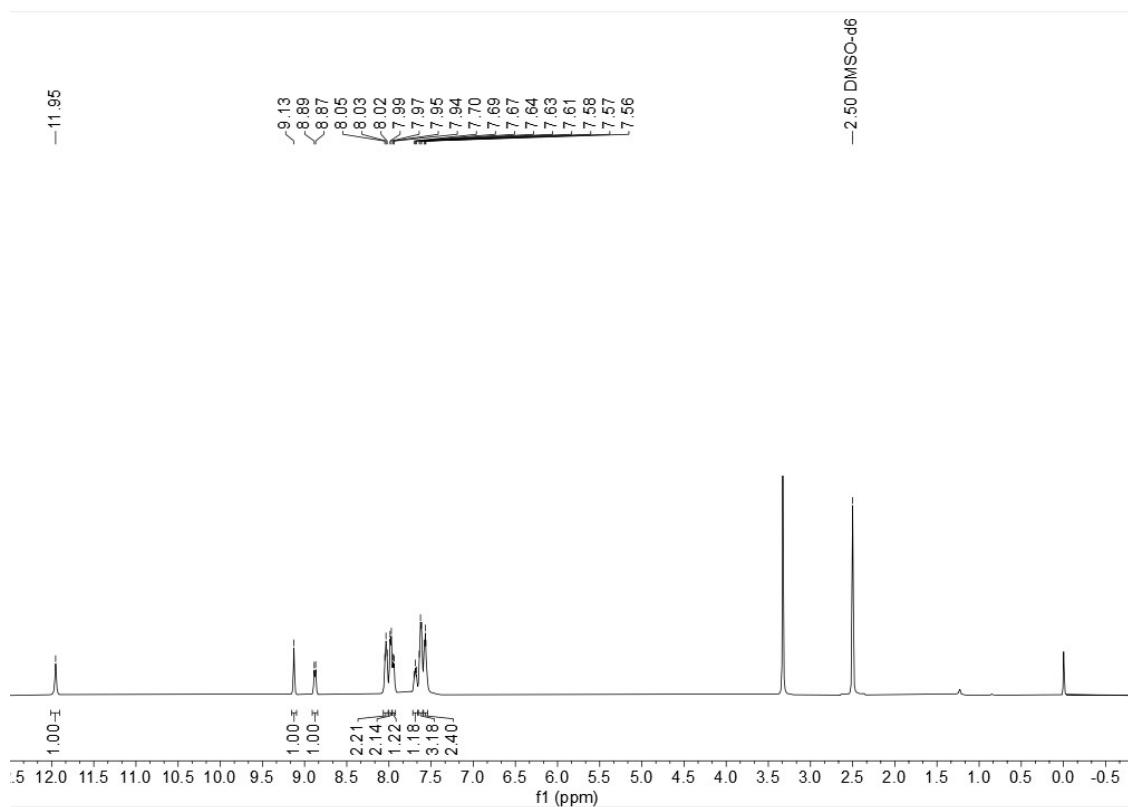

Figure S1.  $^1\text{H}$  NMR spectrum of L1

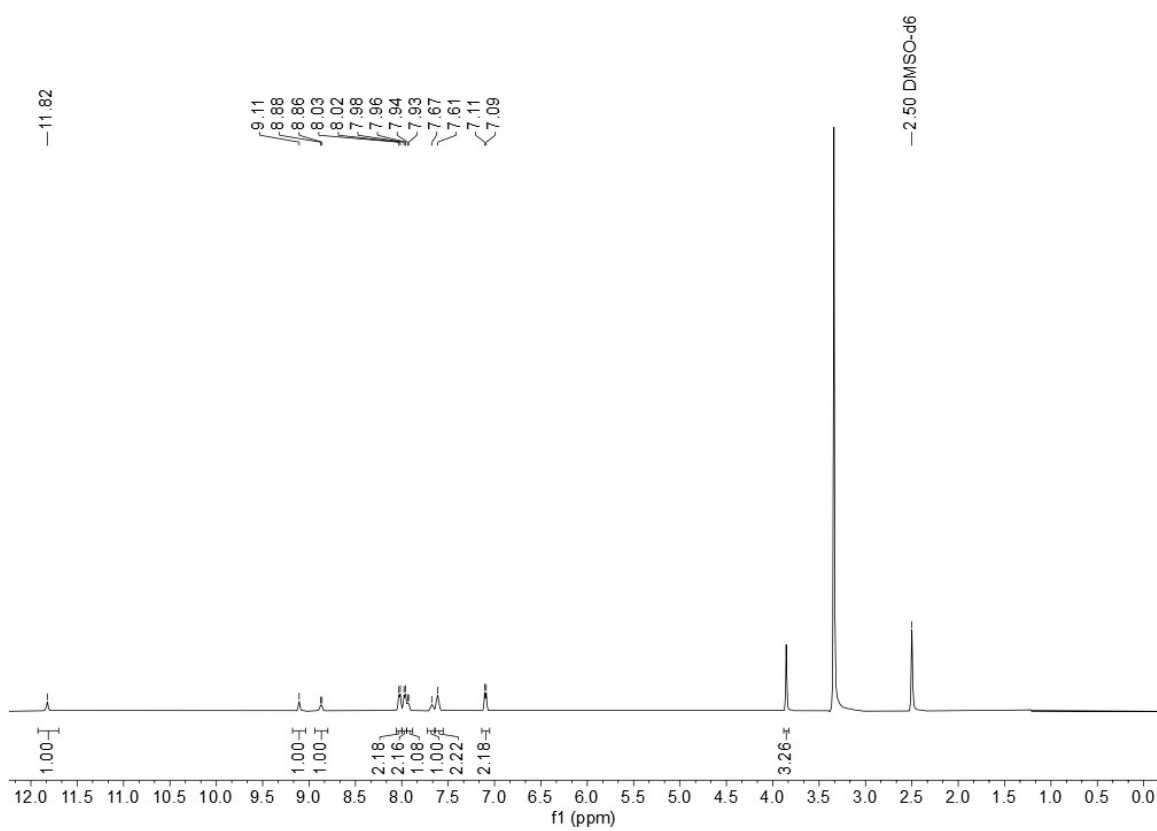

Figure S2.  $^1\text{H}$  NMR spectrum of L2

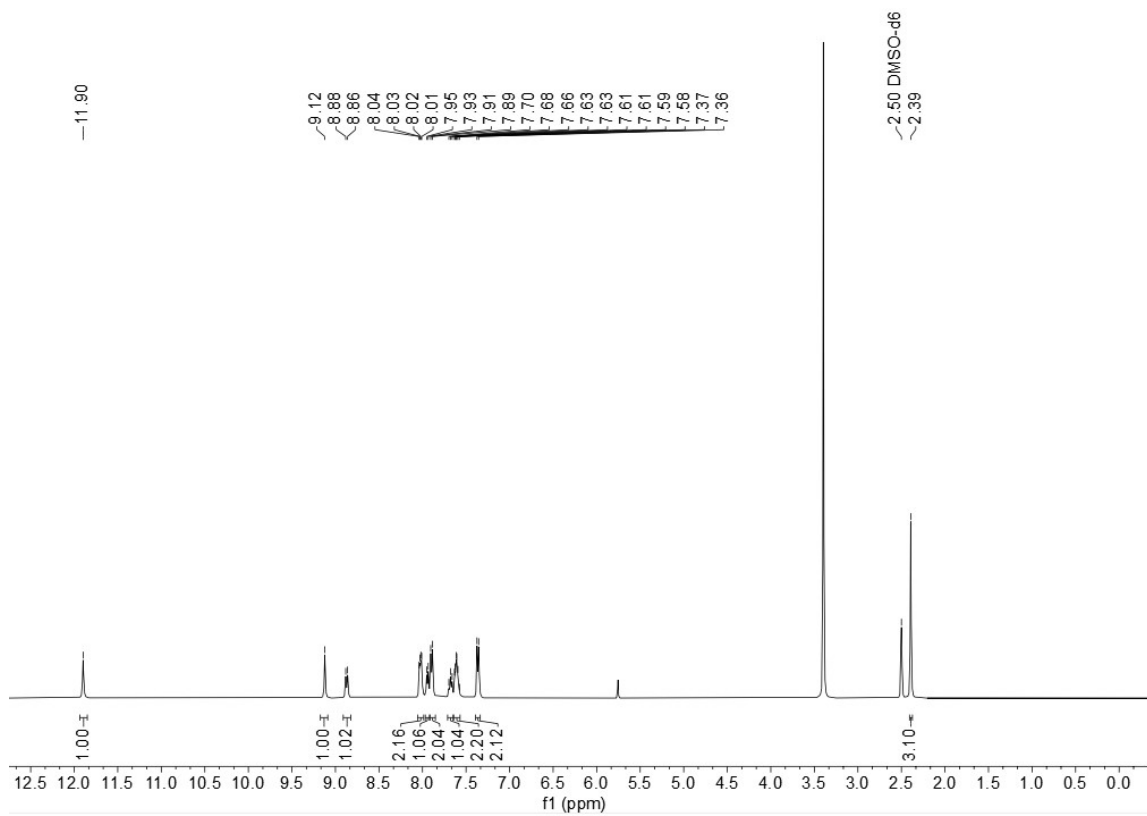

Figure S3. <sup>1</sup>H NMR spectrum of L3

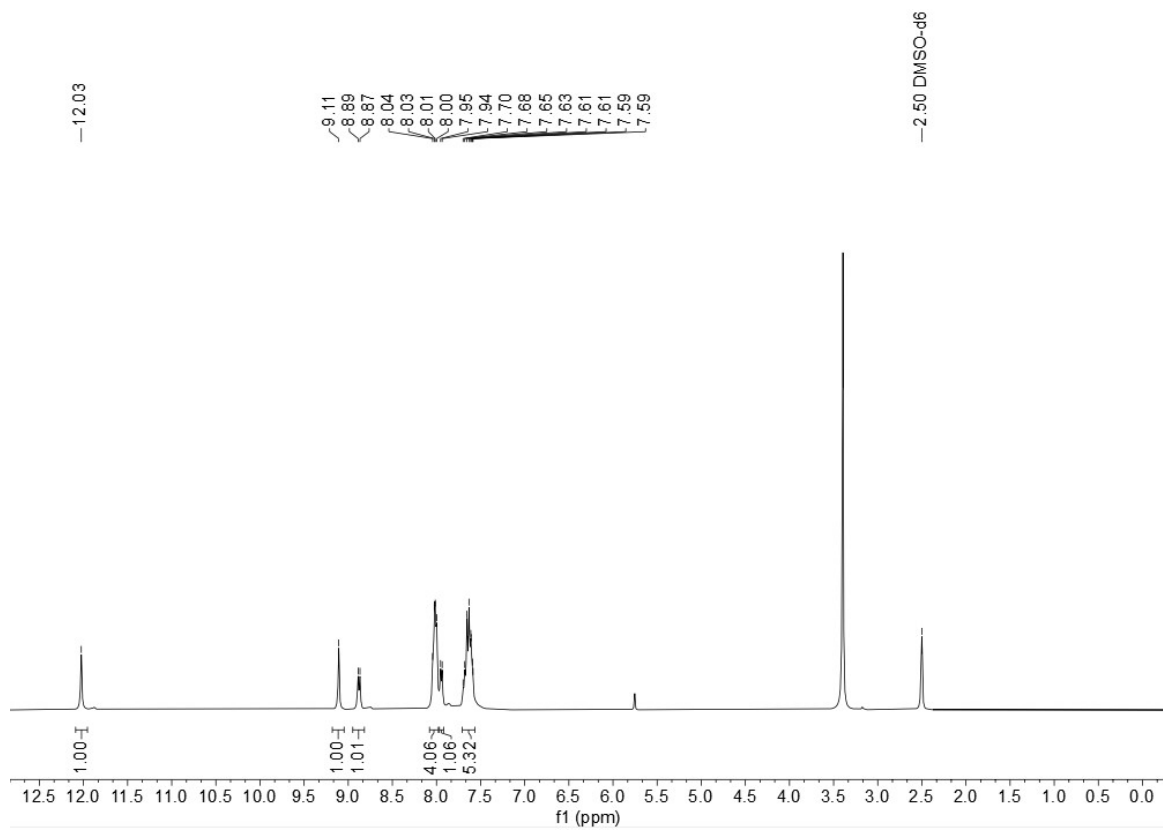

Figure S4. <sup>1</sup>H NMR spectrum of L4

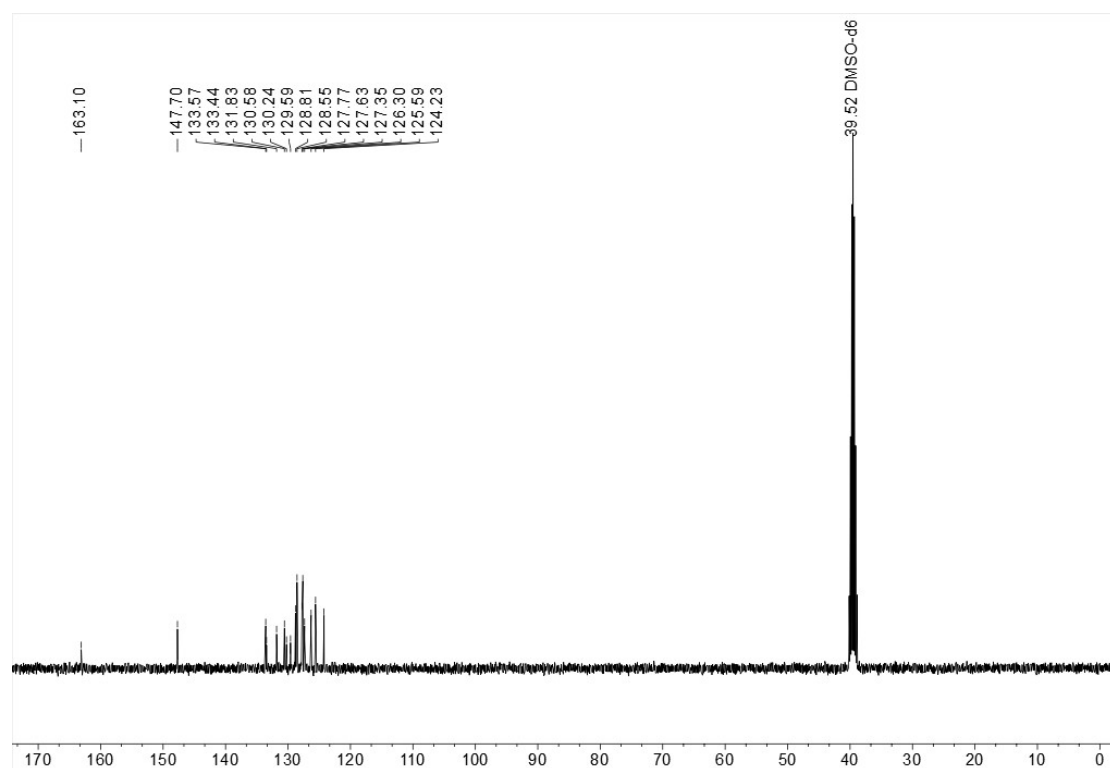

Figure S5.  $^{13}\text{C}$  NMR spectrum of L1

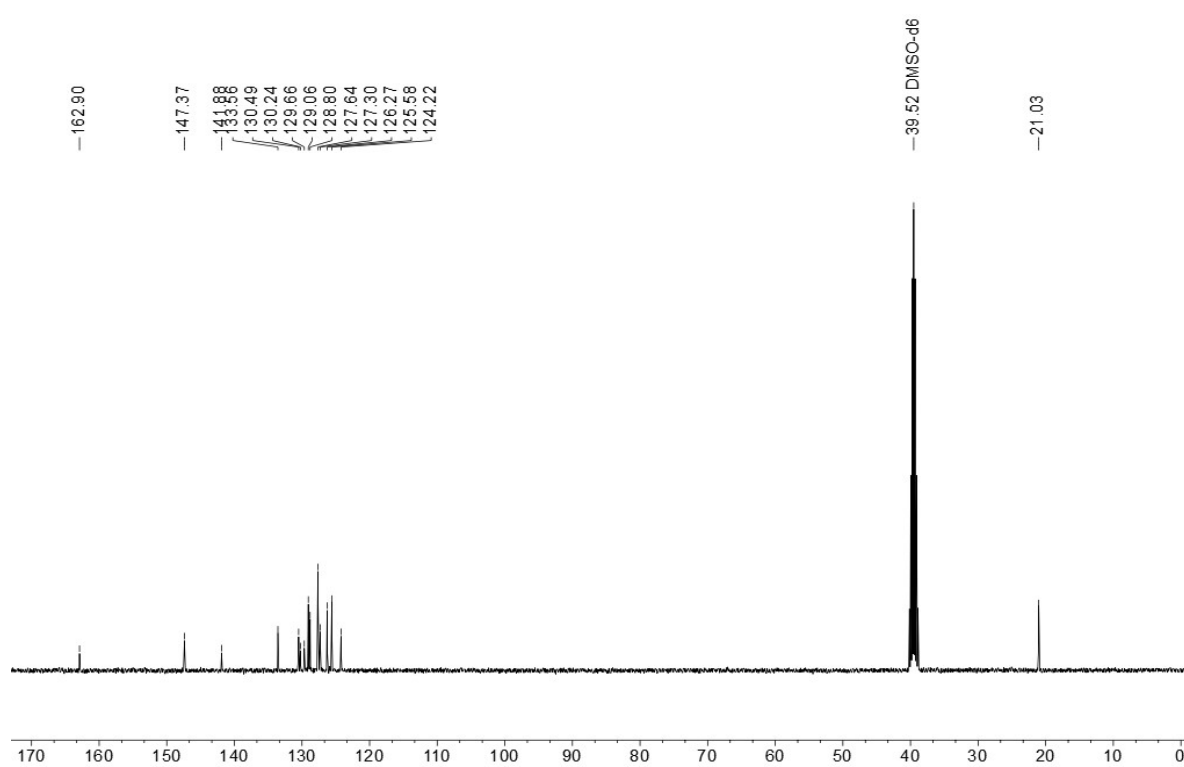

Figure S6.  $^{13}\text{C}$  NMR spectrum of L2

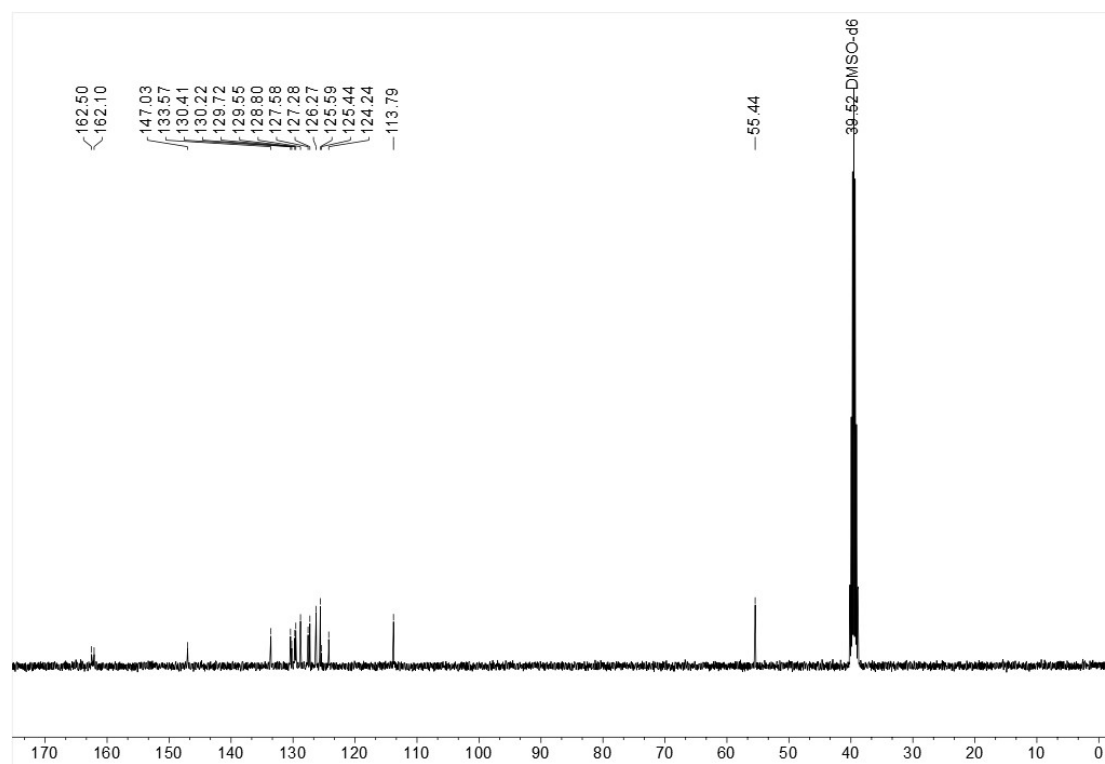

Figure S7.  $^{13}\text{C}$  NMR spectrum of L3

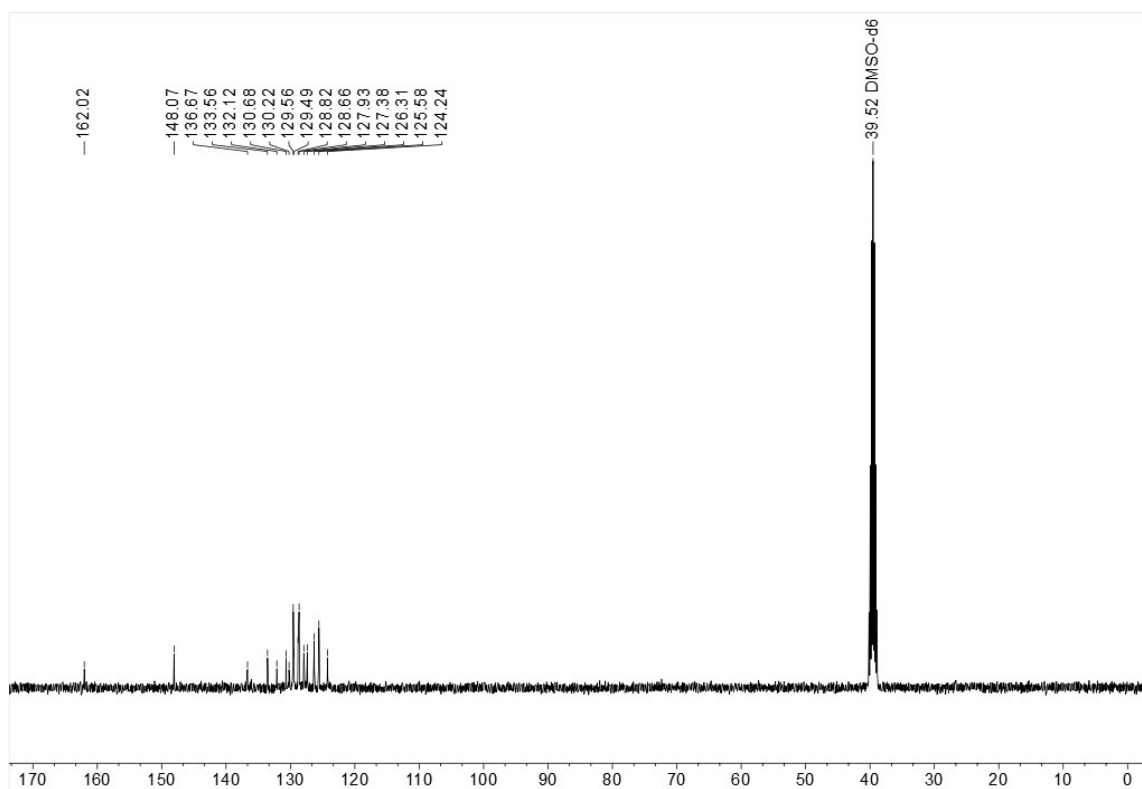

Figure S8.  $^{13}\text{C}$  NMR spectrum of L4

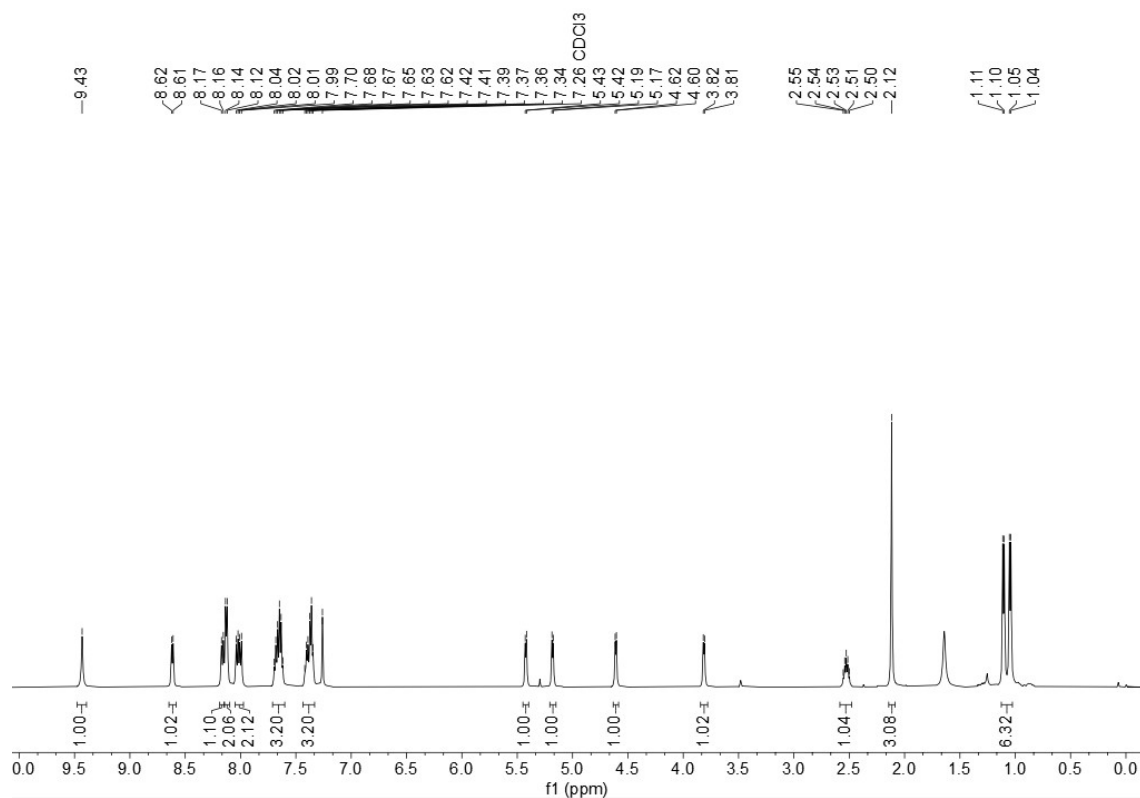

Figure S9.  $^1\text{H}$  NMR spectrum of **1**

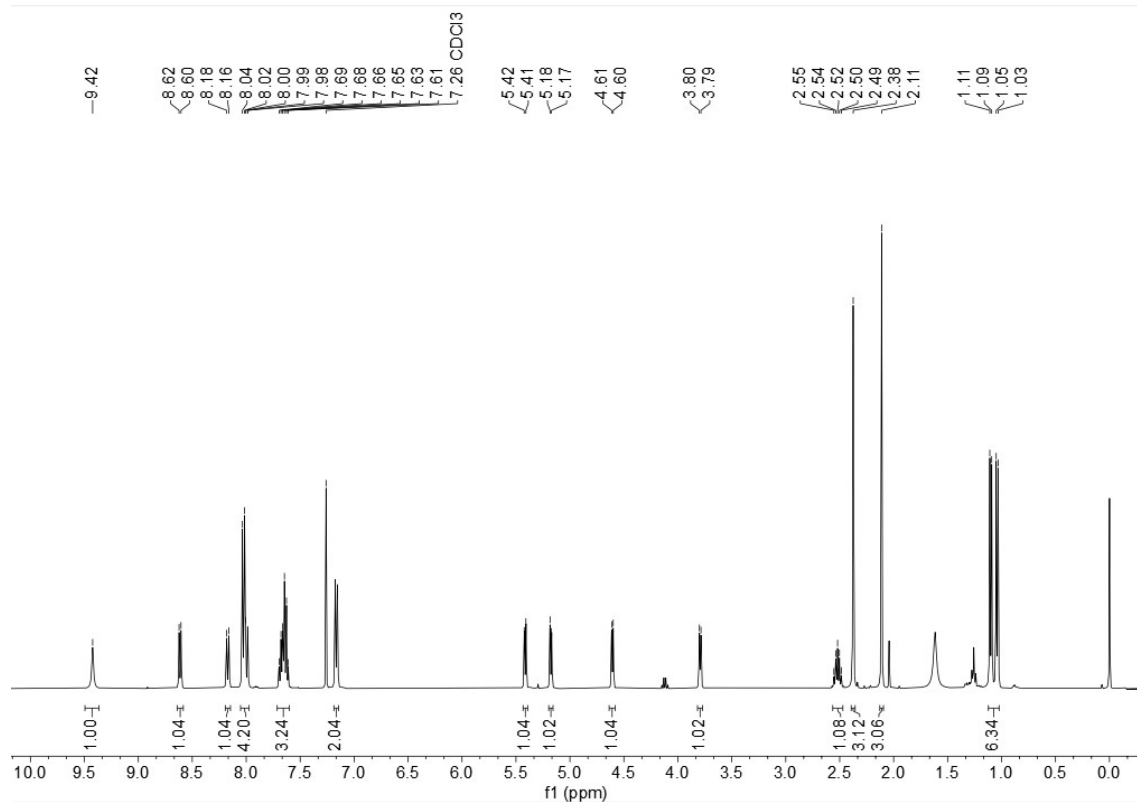

Figure S10.  $^1\text{H}$  NMR spectrum of **2**

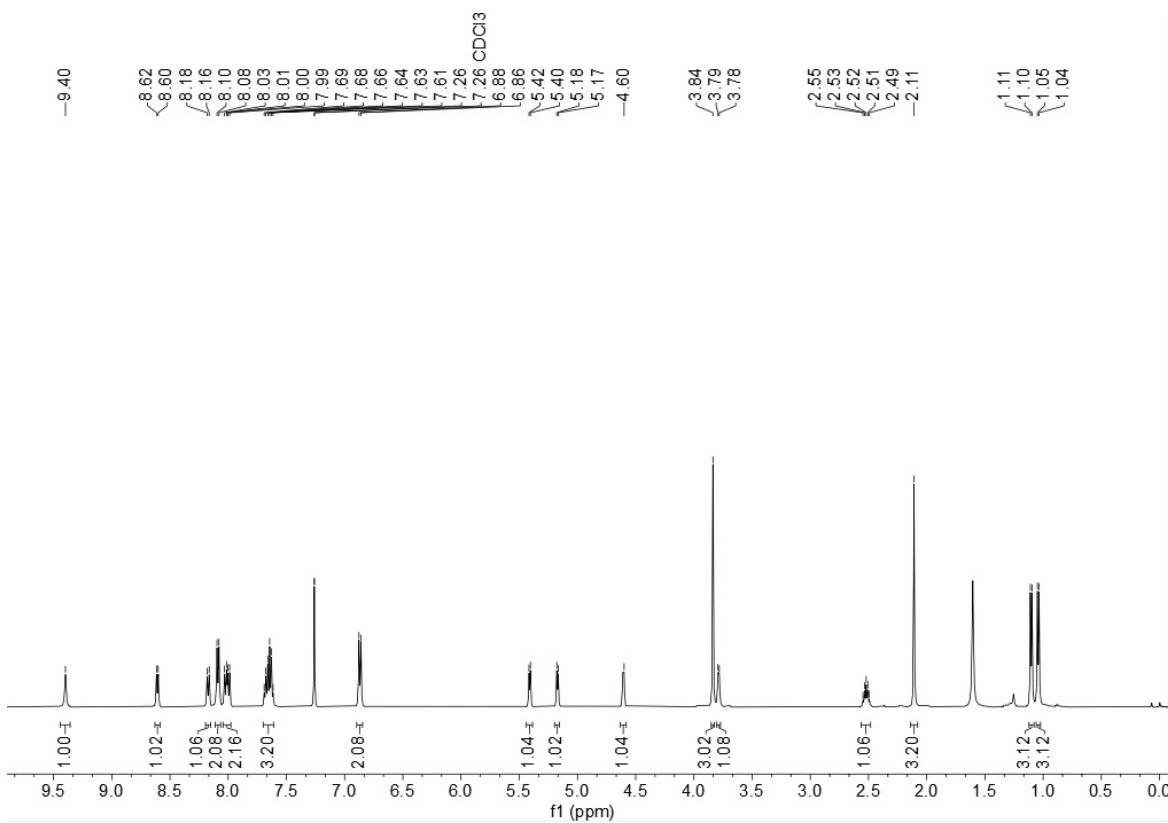

Figure S11.  $^1\text{H}$  NMR spectrum of **3**

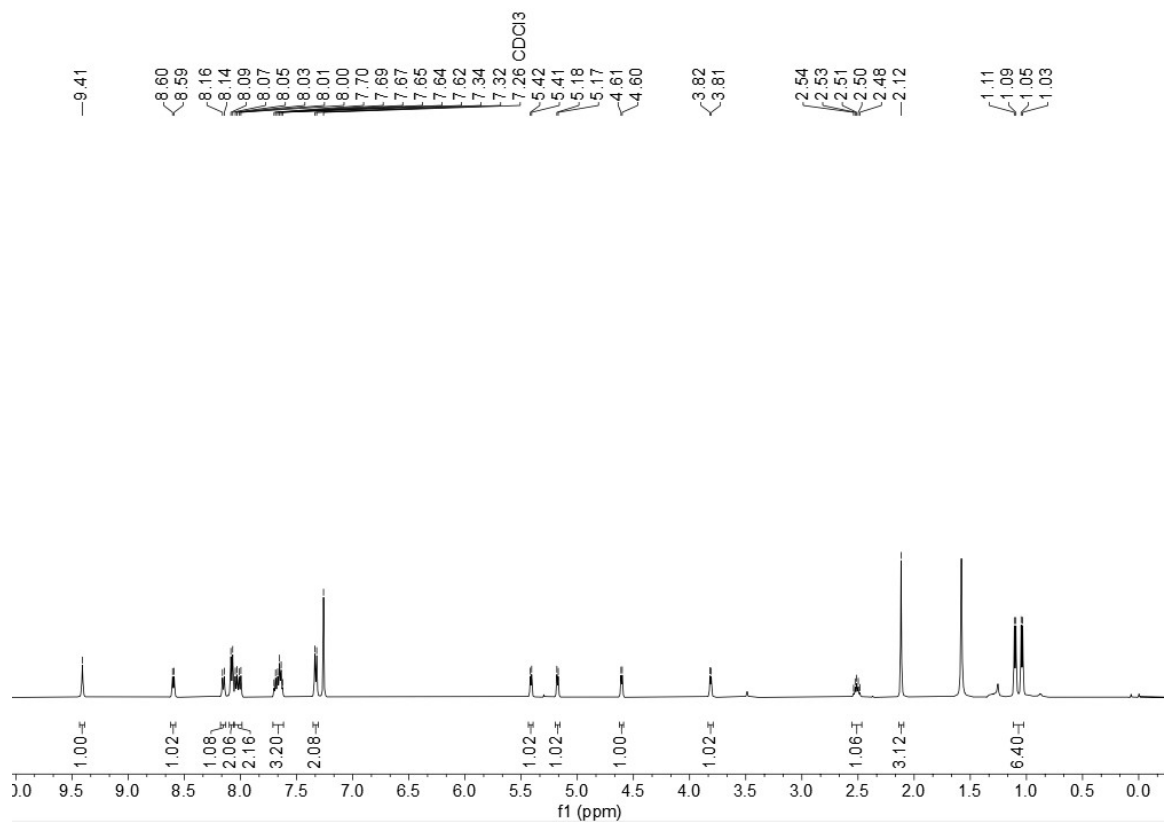

Figure S12.  $^1\text{H}$  NMR spectrum of **4**

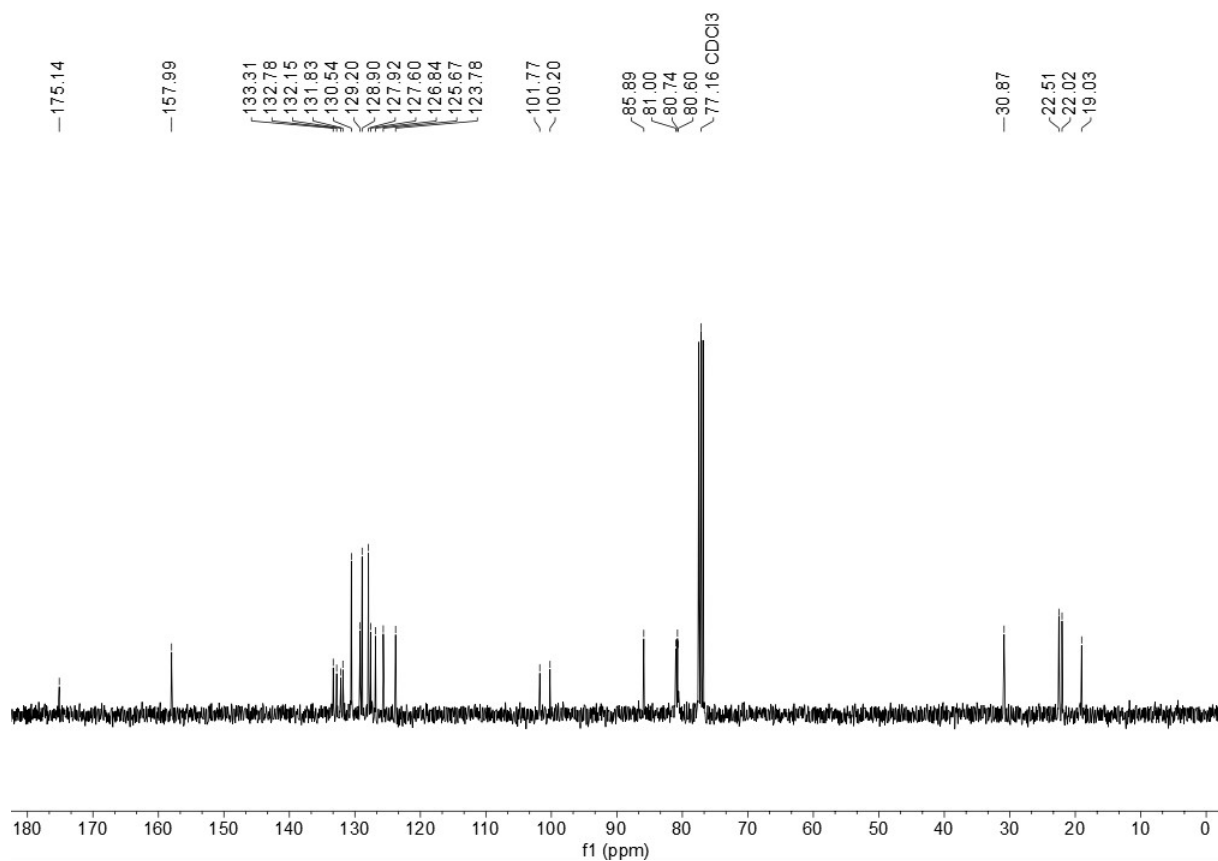

Figure S13. <sup>13</sup>C NMR spectrum of **1**

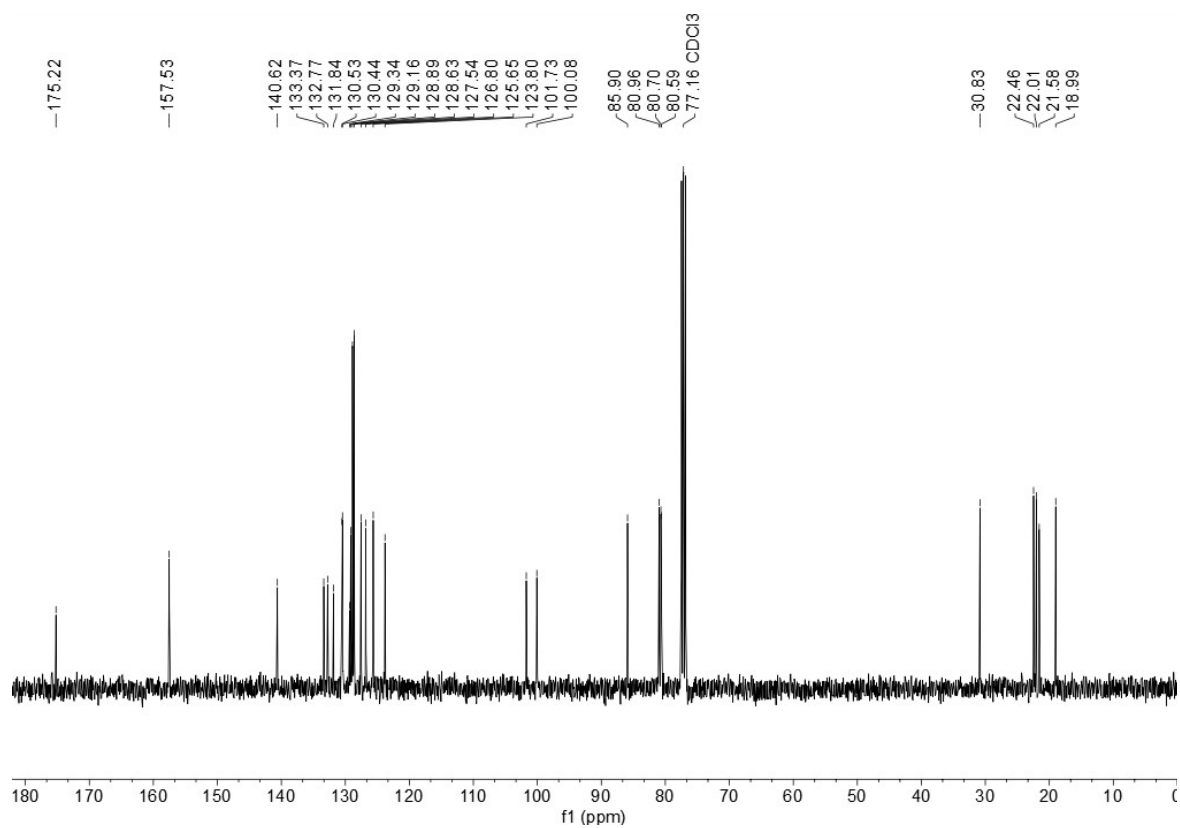

Figure S14. <sup>13</sup>C NMR spectrum of **2**



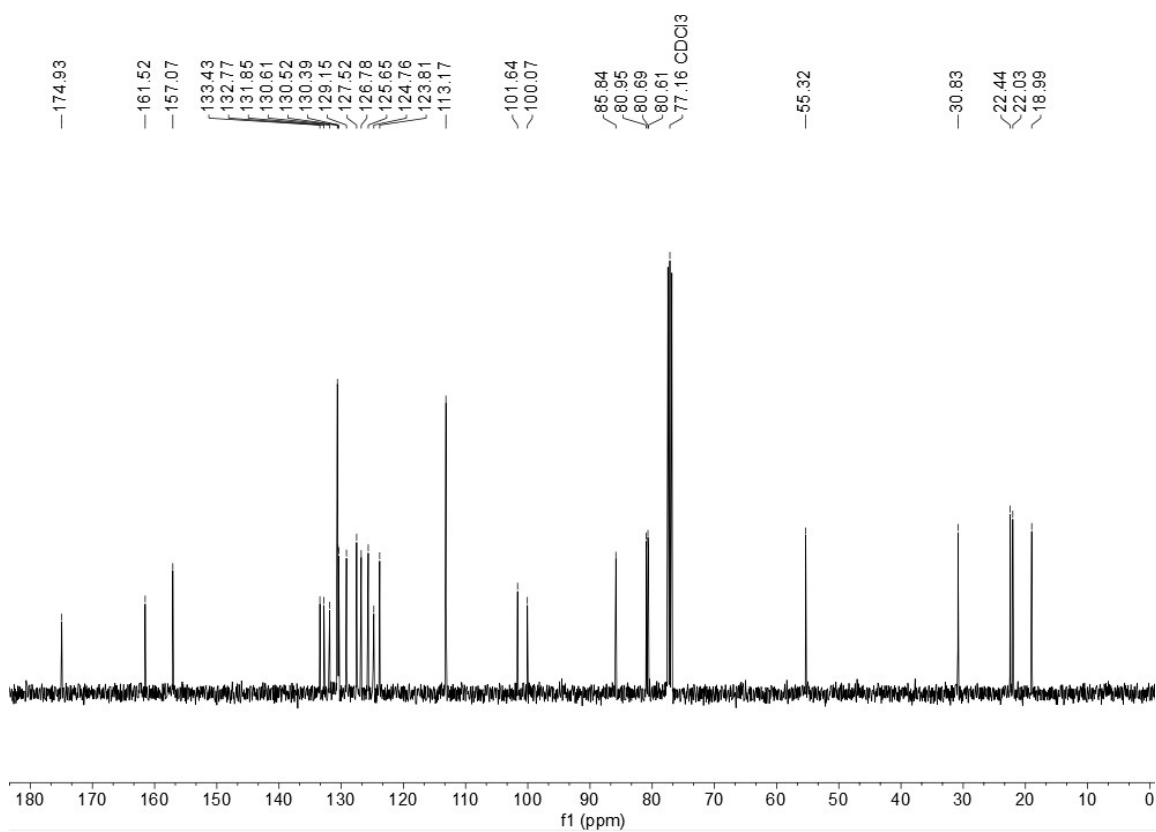

Figure S15. <sup>13</sup>C NMR spectrum of **3**

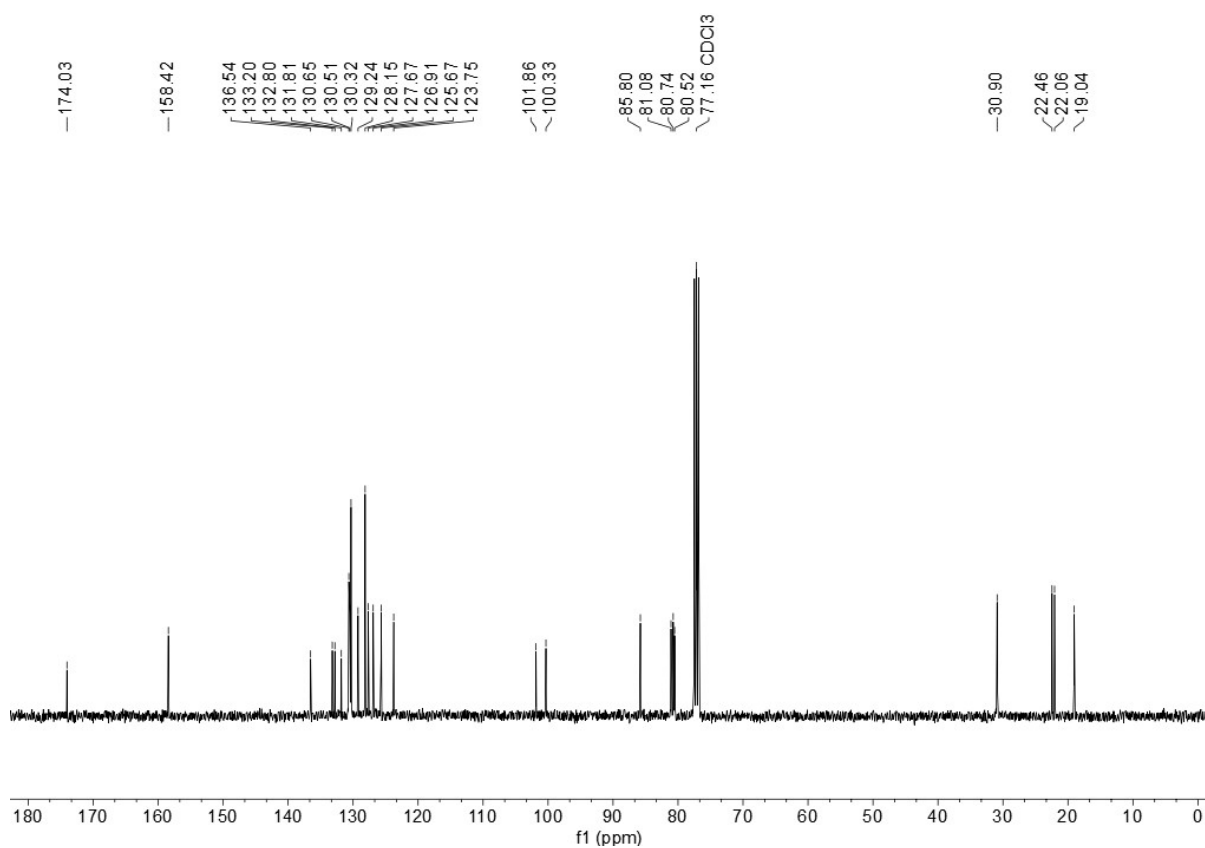

Figure S16. <sup>13</sup>C NMR spectrum of **4**
